# Supplementary material for: Synthesis and structures of monocyclopentadienylniobium complexes with bi- and tri-dentate dithiolate ligandsElectronic supplementary information (ESI) available: NMR data for compounds 1 and 2 in d8-toluene; cyclic voltammogram of compound 1; ESR spectrum of reduced compound 1. See http://www.rsc.org/suppdata/dt/b2/b209823g/
Source: Royal Society of Chemistry journal article supplement (doi:10.1039/b209823g), 2002-12-02
Supplement: b209823g.pdf [file b209823g.pdf]

**Synthesis and Structures of Monocyclopentadienylniobium Complexes with Bi and Tridentate Dithiolate Ligands.**

**Roland K. Dersch, Henrik Jungclas, W. Edward Lindsell\* and Georgina M. Rosair**

**Department of Chemistry, Heriot-Watt University, Riccarton, Edinburgh EH14 4AS, UK.**

**NMR Spectra of compounds 1 AND 2 in *d*<sub>8</sub>-toluene**

**[Nb( $\eta$ -C<sub>5</sub>H<sub>5</sub>)(1,3-S<sub>2</sub>C<sub>3</sub>H<sub>6</sub>)<sub>2</sub>] 1.**

<sup>1</sup>H NMR (C<sub>6</sub>D<sub>5</sub>CD<sub>3</sub>, 400 MHz, 30°C);  $\delta$  1.79 & 1.85 (m, AB system, 4H, SCH<sub>2</sub>CH<sub>2</sub>), 3.55 (m, AA' component, 4H, SCHH), 4.00 (m, BB' component, 4H, SCHH); 5.81 (s, 5H, C<sub>5</sub>H<sub>5</sub>).

**[Nb( $\eta$ -C<sub>5</sub>H<sub>4</sub>CH<sub>3</sub>)(1,3-S<sub>2</sub>C<sub>3</sub>H<sub>6</sub>)<sub>2</sub>] 2.**

<sup>1</sup>H NMR (C<sub>6</sub>D<sub>5</sub>CD<sub>3</sub>, 400 MHz, 30°C);  $\delta$  1.81 & 1.87 (AB system, 4H, SCH<sub>2</sub>CH<sub>2</sub>), 1.94 (s, 3H, CH<sub>3</sub>); 3.57 (m, AA' component, 4H, SCHH), 4.00 (m, BB' component, 4H, SCHH); 5.74 & 5.79 (AA'BB' system, 4H, C<sub>5</sub>H<sub>4</sub>Me).

<sup>13</sup>C{<sup>1</sup>H}NMR (C<sub>6</sub>D<sub>5</sub>CD<sub>3</sub>, 50.3 MHz, 17°C);  $\delta$  15.6 (CH<sub>3</sub>), 25.7 (SCH<sub>2</sub>CH<sub>2</sub>), 40.8 (SCH<sub>2</sub>), 110.0 (CH, Cp'), 112.9 (CH, Cp'), (C-1, Cp', obscured by solvent).
