# Supplementary figures and images for: Synthesis and structures of monocyclopentadienylniobium complexes with bi- and tri-dentate dithiolate ligandsElectronic supplementary information (ESI) available: NMR data for compounds 1 and 2 in d8-toluene; cyclic voltammogram of compound 1; ESR spectrum of reduced compound 1. See http://www.rsc.org/suppdata/dt/b2/b209823g/
Source: Royal Society of Chemistry journal article supplement (doi:10.1039/b209823g), 2002-12-02

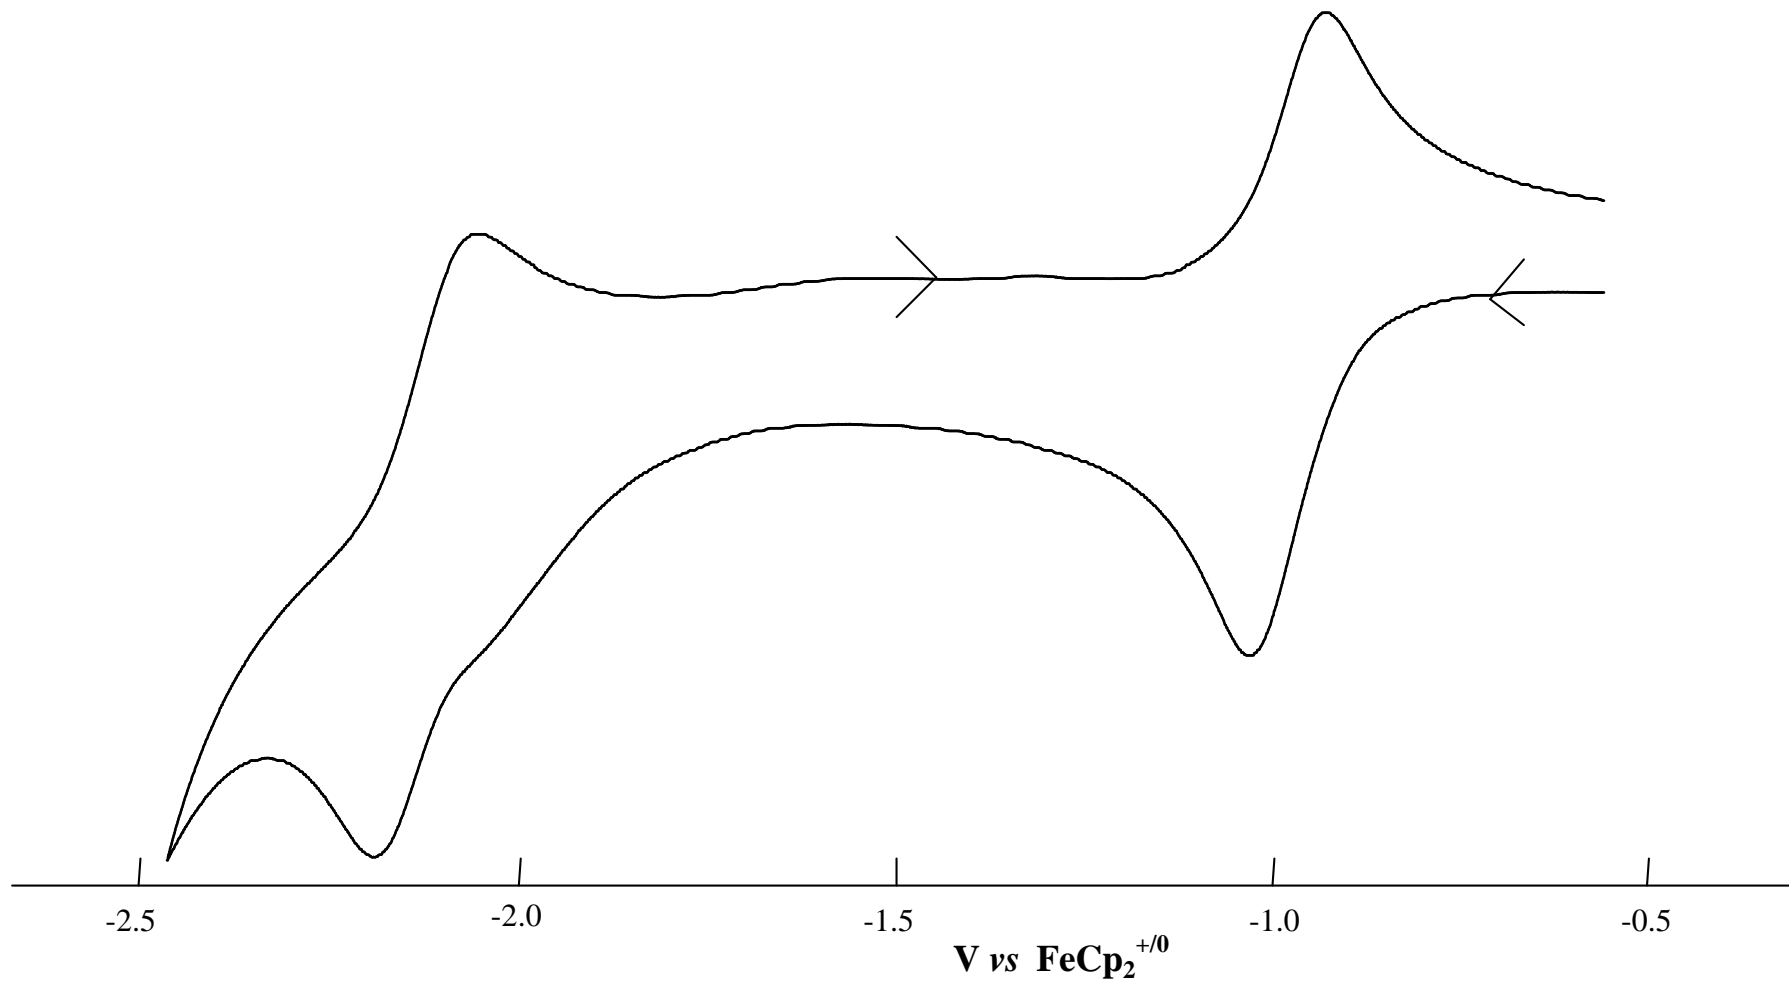

Supplement: b209823g-1.pdf [file b209823g-1.pdf]

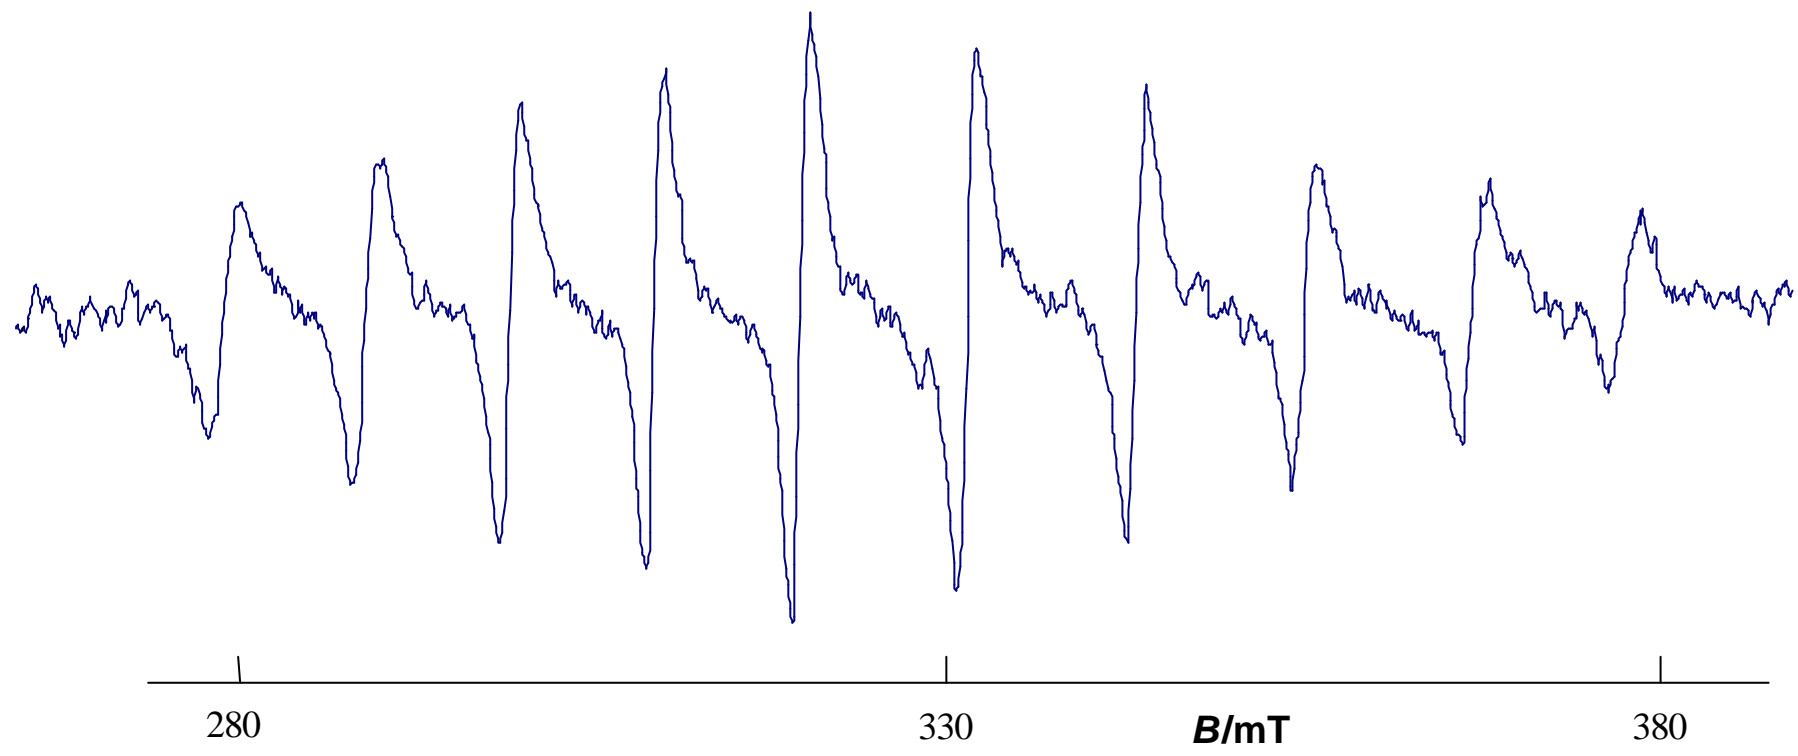

Supplement: b209823g-2.pdf [file b209823g-2.pdf]
